# Supplementary material for: Scoping Review on Platelets and Tumor Angiogenesis: Do We Need More Evidence or Better Analysis?
Source: MDPI journal article supplement (doi:10.3390/ijms232113401), 2022-11-02
Supplement: s1 [file s1]

**Table S1. Search strategy**

|                                                                                                                                                                                                                                                                                                                                                                                                                                                           |
|-----------------------------------------------------------------------------------------------------------------------------------------------------------------------------------------------------------------------------------------------------------------------------------------------------------------------------------------------------------------------------------------------------------------------------------------------------------|
| PUBMED                                                                                                                                                                                                                                                                                                                                                                                                                                                    |
| (platelet[title] or platelet[mesh]) AND (tumor-progression[title/abstract] OR cancer-progression[title/abstract] OR ((angiogenesis[title/abstract] OR “drug resistance”[title/abstract] OR “therapeutic effect”[title/abstract] OR “therapeutic effects”[title/abstract]) AND (tumor[title/abstract] or cancer[title/abstract] or cancer[mesh] OR cancers[title/abstract] OR tumors[title/abstract]))) NOT ("case report"[title] OR "case series"[title]) |
| ISI OF KNOWLEDGE                                                                                                                                                                                                                                                                                                                                                                                                                                          |
|                                                                                                                                                                                                                                                                                                                                                                                                                                                           |
